# Supplementary material for: Optimization of Se- and Zn-Enriched Mycelium of Lentinula edodes (Berk.) Pegler as a Dietary Supplement with Immunostimulatory Activity
Source: MDPI journal article supplement (doi:10.3390/nu15184015), 2023-09-16
Supplement: s1 [file s1]

## SUPPORTING INFORMATION

The additional tables to which reference is made in the text are as follows:

**Table S1.** The total selenium content ( $\mu\text{g/g}$ ) in mycelial dry mass in experiments series I-IV.

| Series I                |                  |                                             | Series II               |                  |                                             | Series III              |                  |                                             | Series IV               |                  |                                             |
|-------------------------|------------------|---------------------------------------------|-------------------------|------------------|---------------------------------------------|-------------------------|------------------|---------------------------------------------|-------------------------|------------------|---------------------------------------------|
| Medium supplements [mM] |                  | Selenium content [ $\mu\text{g/g}$ ] (S.D.) | Medium supplements [mM] |                  | Selenium content [ $\mu\text{g/g}$ ] (S.D.) | Medium supplements [mM] |                  | Selenium content [ $\mu\text{g/g}$ ] (S.D.) | Medium supplements [mM] |                  | Selenium content [ $\mu\text{g/g}$ ] (S.D.) |
| $\text{SeO}_3^{2-}$     | $\text{Zn}^{2+}$ |                                             | $\text{SeO}_3^{2-}$     | $\text{Zn}^{2+}$ |                                             | $\text{SeO}_3^{2-}$     | $\text{Zn}^{2+}$ |                                             | $\text{SeO}_3^{2-}$     | $\text{Zn}^{2+}$ |                                             |
| 0                       | 0                | 2.52 <sub>a</sub> (0.17)                    | 0                       | 0.2              | 0.75 <sub>a</sub> (0.28)                    | 0                       | 0                | 1.2 <sub>a</sub> (0.78)                     | 0.2                     | 0                | 310.84 <sub>a</sub> (84.59)                 |
| 0.1                     | 0                | 73.09 <sub>b</sub> (16.72)                  | 0.1                     | 0.2              | 57.34 <sub>b</sub> (2.23)                   | 0                       | 0.1              | 3.43 <sub>a</sub> (1.1)                     | 0.2                     | 0.1              | 139.82 <sub>b</sub> (57.40)                 |
| 0.2                     | 0                | 380.31 <sub>c</sub> (24.97)                 | 0.2                     | 0.2              | 73.52 <sub>c</sub> (10.16)                  | 0                       | 0.2              | 1.83 <sub>a</sub> (1.1)                     | 0.2                     | 0.2              | 80.83 <sub>c</sub> (4.16)                   |
| 0.4                     | 0                | 904.31 <sub>d</sub> (70.62)                 | 0.4                     | 0.2              | 344.10 <sub>d</sub> (48.65)                 | 0                       | 0.4              | 1.22 <sub>a</sub> (0.88)                    | 0.2                     | 0.4              | 58.39 <sub>d</sub> (12.65)                  |
| 0.6                     | 0                | 1518.44 <sub>e</sub> (96.42)                | 0.6                     | 0.2              | 1256.31 <sub>e</sub> (120.06)               | 0                       | 0.6              | 1.90 <sub>a</sub> (0.92)                    | 0.2                     | 0.6              | 52.74 <sub>d</sub> (4.6)                    |
| 0.8                     | 0                | 1553.91 <sub>e</sub> (102.17)               | 0.8                     | 0.2              | 1395.89 <sub>e</sub> (16.86)                | 0                       | 0.8              | 3.01 <sub>a</sub> (0.65)                    | 0.2                     | 0.8              | 44.59 <sub>d</sub> (6.76)                   |

**Standard deviations (SD) are given in brackets**, n=5 replicates Values in the same column bearing different letters were significantly different ( $p < 0.05$ ).

**Table S2.** The total zinc content ( $\mu\text{g/g}$ ) in mycelial dry mass in experiments series I-IV.

| Series I                |                  |                                         | Series II               |                  |                                         | Series III              |                  |                                         | Series IV               |                  |                                         |
|-------------------------|------------------|-----------------------------------------|-------------------------|------------------|-----------------------------------------|-------------------------|------------------|-----------------------------------------|-------------------------|------------------|-----------------------------------------|
| Medium supplements [mM] |                  | Zinc content [ $\mu\text{g/g}$ ] (S.D.) | Medium supplements [mM] |                  | Zinc content [ $\mu\text{g/g}$ ] (S.D.) | Medium supplements [mM] |                  | Zinc content [ $\mu\text{g/g}$ ] (S.D.) | Medium supplements [mM] |                  | Zinc content [ $\mu\text{g/g}$ ] (S.D.) |
| $\text{SeO}_3^{2-}$     | $\text{Zn}^{2+}$ |                                         | $\text{SeO}_3^{2-}$     | $\text{Zn}^{2+}$ |                                         | $\text{SeO}_3^{2-}$     | $\text{Zn}^{2+}$ |                                         | $\text{SeO}_3^{2-}$     | $\text{Zn}^{2+}$ |                                         |
| 0                       | 0                | 298.10 <sub>a</sub> (29.02)             | 0                       | 0.2              | 887.82 <sub>a</sub> (67.12)             | 0                       | 0                | 308.31 <sub>a</sub> (32.89)             | 0.2                     | 0                | 288.96 <sub>a</sub> (50.83)             |
| 0.1                     | 0                | 210.64 <sub>b</sub> (16.66)             | 0.1                     | 0.2              | 708.57 <sub>b</sub> (41.68)             | 0                       | 0.1              | 648.89 <sub>b</sub> (70.89)             | 0.2                     | 0.1              | 200.15 <sub>a</sub> (97.07)             |
| 0.2                     | 0                | 288.96 <sub>c</sub> (50.97)             | 0.2                     | 0.2              | 639.57 <sub>c</sub> (45.95)             | 0                       | 0.2              | 920.28 <sub>c</sub> (152.99)            | 0.2                     | 0.2              | 217.05 <sub>a</sub> (55.07)             |
| 0.4                     | 0                | 195.71 <sub>d</sub> (7.95)              | 0.4                     | 0.2              | 603.41 <sub>c</sub> (24.20)             | 0                       | 0.4              | 1372.89 <sub>c</sub> (367.10)           | 0.2                     | 0.4              | 278.22 <sub>a</sub> (33.31)             |
| 0.6                     | 0                | 151.87 <sub>d</sub> (42.12)             | 0.6                     | 0.2              | 590.60 <sub>c</sub> (13.17)             | 0                       | 0.6              | 2097.30 <sub>d</sub> (290.13)           | 0.2                     | 0.6              | 494.77 <sub>b</sub> (31.28)             |
| 0.8                     | 0                | 181.92 <sub>d</sub> (19.46)             | 0.8                     | 0.2              | 591.25 <sub>c</sub> (18.41)             | 0                       | 0.8              | 2370.32 <sub>d</sub> (235.44)           | 0.2                     | 0.8              | 874.94 <sub>c</sub> (194.16)            |

**Standard deviations (SD) are given in brackets**, n=5 replicates. Values in the same column bearing different letters were significantly different ( $p < 0.05$ ).
